# Supplementary material for: An in depth look into intracranial Abscesses and Empyemas: a 10-year experience in a single institute.
Source: Research Square preprint supplement (doi:10.21203/rs.3.rs-848691/v1), 2021-09-16
Supplement: Supplementary file 1 [file c1422ff0f63a61b17df6fc14.docx]

| Patient Characteristics (N=37) | Overall (%) |
| --- | --- |
| Age |  |
| Mean (SD) | 28.8 (20.7) |
| Age groups |  |
| 0-18 | 12 (32.4) |
| 19-39 | 12 (32.4) |
| 40-59 | 11 (29.7) |
| 60-79 | 2 (5.4) |
| Sex |  |
| Male | 29 (78.4) |
| Female | 8 (21.6) |
| Presenting symptoms |  |
| Fever | 15 (40.5) |
| Vomiting | 9 (24.3) |
| Headache | 13 (35.1) |
| Loss of consciousness | 8 (21.6) |
| Focal neurological deficit | 20 (54.1) |
| Seizure | 11 (29.7) |
| Secondary immunodeficiency | 7 (18.9) |
| WBC |  |
| High | 18 (52.9) |
| Normal | 16 (47.1) |
| CRP |  |
| High | 22 (75.9) |
| Normal | 7 (24.1) |
| ESR |  |
| High | 26 (83.9) |
| Normal | 5 (16.1) |
| Neurological comorbidities |  |
| Epilepsy | 3 (8.1) |
| Stroke | 1 (2.7) |
| Tumor | 3 (8.1) |
| CSF infections |  |
| Meningitis | 8 (21.6) |
| Ventriculitis | 3 (8.1) |
| Treatment |  |
| Excision | 16 (43.2) |
| Aspiration | 14 (37.8) |
| Conservative | 7 (18.9) |
| GCS upon admission |  |
| 15 | 26 (70.3) |
| 9-14 | 10 (27.0) |
| 8 | 1 (2.7) |
| GCS upon discharge |  |
| 15 | 31 (83.8) |
| 9-14 | 4 (10.8) |
| 8 | 1 (2.7) |
| Length of hospital stay (days) |  |
| Mean (SD) | 35.8 (20.9) |
| Maximum abscess diameter (cm) |  |
| Mean (SD) | 2.78 (1.99) |
| Number of abscesses |  |
| Multiple | 11 (29.7) |
| Single | 26 (70.3) |
| Location |  |
| Cerebellum | 1 (2.7) |
| Frontoparietal | 16 (43.2) |
| Hemispheric | 4 (10.8) |
| Parietooccipital | 8 (21.6) |
| Temporoparietal | 8 (21.6) |
| GOS |  |
| Favorable | 34 (91.9) |
| Unfavorable | 3 (8.1) |
| Follow-up for all patients (days) |  |
| Median [range] | 30 [4, 213] |
| Follow-up after reoperation (days) |  |
| Median [range] | 14.5 [1, 27] |
| **Table 1**: Patient characteristics | |

| Microorganism | Overall (N=14) (%) |
| --- | --- |
| Bacterial |  |
| Staphylococcus aureus | 4 (28.6) |
| Streptococcus milleri | 3 (21.4) |
| Escherichia coli | 2 (14.3) |
| Coagulase-negative Staphylococcus species | 1 (7.1) |
| Klebsiella pneumoniae | 1 (7.1) |
| Morganella morganii | 1 (7.1) |
| Proteus mirabilis | 1 (7.1) |
| Fungal |  |
| Aspergillus niger | 1 (7.1) |
|  |  |
| No growth | 16 |

**Table 2**: Microorganisms from pus cultures

| Variables | Reoperation  group (%)  (N=11) | Single-operation group (%) (N=26) | Effect measure  (V, D)* | P-value |
| --- | --- | --- | --- | --- |
| Age |  |  |  |  |
| Mean (SD) | 26.5 (19.0) | 29.8 (21.7) | <0.001 | 0.647 |
| Age groups |  |  |  |  |
| 0-18 | 4 (36.4) | 8 (30.8) | 0.055 | - |
| 19-39 | 3 (27.3) | 9 (34.6) |  |  |
| 40-59 | 4 (36.4) | 7 (26.9) |  |  |
| 60-79 | 0 (0) | 2 (7.7) |  |  |
| Sex |  |  |  |  |
| Male | 9 (81.8) | 20 (76.9) | 0.054 | 1.000 |
| Female | 2 (18.2) | 6 (23.1) |  |  |
| Presenting symptoms |  |  |  |  |
| Fever | 6 (54.5) | 9 (34.6) | 0.186 | 0.768 |
| Vomiting | 4 (36.4) | 5 (19.2) |  |  |
| Headache | 3 (27.3) | 10 (38.5) |  |  |
| Loss of consciousness | 4 (36.4) | 4 (15.4) |  |  |
| Focal neurological deficit | 6 (54.5) | 14 (53.8) |  |  |
| Seizure | 3 (27.3) | 8 (42.1) |  |  |
| WBC |  |  |  |  |
| High | 5 (45.5) | 13 (56.5) | 0.104 | 0.812 |
| Normal | 6 (54.5) | 10 (43.5) |  |  |
| CRP |  |  |  |  |
| High | 10 (90.9) | 16 (80) | 0.142 | 0.631 |
| Normal | 1 (9.1) | 4 (20) |  |  |
| ESR |  |  |  |  |
| High | 8 (88.9) | 14 (70) | 0.204 | 0.382 |
| Normal | 1 (11.1) | 6 (30) |  |  |
| Neurological comorbidities |  |  |  |  |
| Epilepsy | 1 (9.1) | 2 (7.7) |  |  |
| Stroke | 1 (9.1) | 0 (0) |  |  |
| Tumor | 2 (18.2) | 1 (3.8) |  |  |
| CSF infections |  |  |  |  |
| Meningitis | 2 (18.2) | 6 (23.4) | 0.083 | 1.000 |
| Ventriculitis | 1 (9.1) | 2 (7.7) |  |  |
| Treatment |  |  |  |  |
| Excision | 5 (45.5) | 11 (57.9) | 0.120 | 0.781 |
| Aspiration | 6 (54.5) | 8 (42.1) |  |  |
| GCS upon admission |  |  |  |  |
| 15 | 6 (54.5) | 20 (76.9) | - | - |
| 9-14 | 4 (36.4) | 6 (23.1) |  |  |
| 8 | 1 (9.1) | 0 (0) |  |  |
| GCS upon discharge |  |  |  |  |
| 15 | 11 (100) | 20 (80.0) | - | - |
| 9-14 | 0 (0) | 4 (16.0) |  |  |
| 8 | 0 (0) | 1 (4.0) |  |  |
| Length of hospital stay (days) |  |  |  |  |
| Mean (SD) | 47.2 (29.0) | 31.0 (14.8) | 0.815 | 0.117 |
| Multiple Abscesses |  |  |  |  |
| Multiple | 1 (9.1%) | 10 (38.5%) | 0.294 | 0.119 |
| Single | 10 (90.9%) | 16 (61.5%) |  |  |
| Maximum abscess diameter (cm) |  |  |  |  |
| Mean (SD) | 3.87 (2.58) | 2.34 (1.55) | 0.808 | 0.127 |
| Location |  |  |  |  |
| Cerebellum | 1 (9.1%) | 0 (0%) | - | - |
| Frontoparietal | 5 (45.5%) | 11 (42.3%) |  |  |
| Hemispheric | 2 (18.2%) | 2 (7.7%) |  |  |
| Parietooccipital | 1 (9.1%) | 7 (26.9%) |  |  |
| Temporoparietal | 2 (18.2%) | 6 (23.1%) |  |  |
| Bacterial microorganism** |  |  |  |  |
| Staphylococcus aureus | 1 (9.1) | 3 (15.8) | - | - |
| Streptococcus milleri | 2 (18.2) | 1 (5.3) |  |  |
| Escherichia coli | 0 (0) | 2 (10.5) |  |  |
| Coagulase-negative Staphylococcus species | 0 (0) | 1 (5.3) |  |  |
| Klebsiella pneumoniae | 1 (9.1) | 0 (0) |  |  |
| Morganella morganii | 1 (9.1) | 0 (0) |  |  |
| Proteus mirabilis | 1 (9.1) | 0 (0) |  |  |
| Fungal microorganism |  |  |  |  |
| Aspergillus niger | 1 (9.1) | 0 (0) | - | - |
| No growth | 4 (36.4) | 12 (63.2) |  |  |
|  |  |  |  |  |
| * Cramer’s V and Cohen’s D were used as effect measures.  ** Patients who underwent conservative treatment did not provide pus samples for microbial cultures.  **Table 3**: Patient characteristics upon clinical presentation classified upon reoperation. | | | | |

| # | Sex | Age | Location | GCS at admission | Presenting symptoms and comorbidities | Maximum abscess diameter (cm) | # of abscesses | Microorganism | Treatment type |
| --- | --- | --- | --- | --- | --- | --- | --- | --- | --- |
| 1 | F | 33 | Frontoparietal | 14 | Fever Left side weakness Headache FND Epilepsy | 3.4 | 2 | Staphylococcus aureus | Aspiration |
| 2 | M | 29 | Frontoparietal | 14 | Headache FND | 2.8 | 1 | E. coli | Aspiration |
| 3  **Table 4:** Characteristics of patients with unfavorable outcomes (FND: Focal neurological deficit). | M | 8 | Frontoparietal | 12 | Fever Seizure | 1.1 | 1 | Negative culture | Conservative |
